# Supplementary material
Source: MDPI journal article supplement (https://www.mdpi.com/2071-1050/14/20/13157)
Supplement: s1 [file s1]

**Table S1.** Excluded articles.

| #       | Author (s),<br>year of public<br>ation | Title                                                                                                                                                        | Excluded for the reason of |                                        |          |              |                                        |
|---------|----------------------------------------|--------------------------------------------------------------------------------------------------------------------------------------------------------------|----------------------------|----------------------------------------|----------|--------------|----------------------------------------|
|         |                                        |                                                                                                                                                              | Population                 | Intervention                           | Outcomes | Study design | Full text<br>unavailable-<br>Duplicate |
| MEDLINE |                                        |                                                                                                                                                              |                            |                                        |          |              |                                        |
| 1       | Beyene<br>et al,<br>2019               | Being in a space of sharing decision-making for dignified mental care                                                                                        | No students' involvement   |                                        |          |              |                                        |
| 2       | Davies<br>et al,<br>2019               | What are the mechanisms that support healthcare professionals to adopt assisted decision-making practice? A rapid realist review. [Review]                   | No students' involvement   |                                        |          |              |                                        |
| 3       | Michal<br>sen et<br>al,<br>2019        | Interprofessional Shared Decision-Making in the ICU: A Systematic Review and Recommendations From an Expert Panel                                            | No students' involvement   |                                        |          |              |                                        |
| 4       | Gualan<br>o et al,<br>2019             | Could shared decision making affect staying in hospital? A cross-sectional pilot study                                                                       | No students' involvement   |                                        |          |              |                                        |
| 5       | Pennin<br>gton et<br>al,<br>2018       | Tools for testing decision-making capacity in dementia                                                                                                       |                            | No health care professions involvement |          |              |                                        |
| 6       | Park &<br>Cho,<br>2018                 | Shared decision-making in the paediatric field: a literature review and concept analysis. [Review]                                                           | No students' involvement   |                                        |          |              |                                        |
| 7       | Légaré<br>et al,<br>2012               | Patients' perceptions of sharing in decisions: a systematic review of interventions to enhance shared decision making in routine clinical practice. [Review] |                            | No health care professions involvement |          |              |                                        |
| 8       | Légaré<br>et al,<br>2011               | A conceptual framework for interprofessional shared decision making in home care: protocol for a feasibility study                                           | No students' involvement   |                                        |          |              |                                        |
| 9       | Jensen<br>et al,<br>2009               | Paramedic clinical decision making during high acuity emergency calls: design and methodology of a Delphi                                                    | No students' involvement   |                                        |          |              |                                        |

|        |                       |                                                                                                                                                         |                          |                                                  |  |  |  |
|--------|-----------------------|---------------------------------------------------------------------------------------------------------------------------------------------------------|--------------------------|--------------------------------------------------|--|--|--|
|        |                       | study                                                                                                                                                   |                          |                                                  |  |  |  |
| 10     | Lee et al, 2008       | Professional relationships in palliative care decision making                                                                                           | No students' involvement |                                                  |  |  |  |
| 11     | Sabo et al, 2007      | The decision-making experience among women diagnosed with stage I and II breast cancer                                                                  | No students' involvement |                                                  |  |  |  |
| 12     | Bekker et al, 2003    | Understanding why decision aids work: linking process with outcome                                                                                      | No students' involvement |                                                  |  |  |  |
| 13     |                       | Evidence-based laboratory medicine: supporting decision-making. [Review] [79 refs]                                                                      |                          | No different health care professions involvement |  |  |  |
| PubMed |                       |                                                                                                                                                         |                          |                                                  |  |  |  |
| 14     | Jackson et al, 2018   | Factors influencing decisions of mental health professionals to release service users from seclusion: A qualitative study                               | No students' involvement |                                                  |  |  |  |
| 15     | Anderson et al, 2019  | Communication between healthcare professionals and relatives of patients approaching the end-of-life: A systematic review of qualitative evidence.      | No students' involvement |                                                  |  |  |  |
| 16     | Thomas et al, 2018    | 'An ethically-justifiable, practical approach to decision-making surrounding conjoined-twin separation.                                                 | No students' involvement |                                                  |  |  |  |
| 17     | Al-Tannir et al, 2017 | Patient experiences of engagement with care plans and healthcare professionals' perceptions of that engagement.                                         | No students' involvement |                                                  |  |  |  |
| 18     | Morsheid et al, 2017  | Evaluation of an online training for improving self-reported evidence-based decision-making skills in cancer control among public health professionals. | No students' involvement |                                                  |  |  |  |
| 19     | Haman et al, 2017     | Shared decision making PLUS - a cluster-randomized trial with inpatients suffering from schizophrenia (SDM-PLUS).                                       | No students' involvement |                                                  |  |  |  |
| 20     | Delany                | 'A good resource for parents, but will                                                                                                                  | No students'             |                                                  |  |  |  |

|    |                                  |                                                                                                                                                        |                          |                                        |  |  |  |
|----|----------------------------------|--------------------------------------------------------------------------------------------------------------------------------------------------------|--------------------------|----------------------------------------|--|--|--|
|    | et al,<br>2017                   | clinicians use it?: Evaluation of a resource for paediatric end-of-life decision making.                                                               | involvement              |                                        |  |  |  |
| 21 | Coyne<br>et al,<br>2016          | Interventions for promoting participation in shared decision-making for children with cancer.                                                          |                          | No health care professions involvement |  |  |  |
| 22 | Henson<br>et al,<br>2016         | 'I'll be in a safe place': a qualitative study of the decisions taken by people with advanced cancer to seek emergency department care.                |                          | No health care professions involvement |  |  |  |
| 23 | Trotta<br>et al,<br>2016         | Health professionals' perceptions about the decision-making process in the care of pediatric patients.                                                 | No students' involvement |                                        |  |  |  |
| 24 | Bounio<br>ls et al,<br>2016      | Evaluating the quality of shared decision making during the patient-carer encounter: a systematic review of tools.                                     | No students' involvement |                                        |  |  |  |
| 25 | Thompson-Leduc<br>et al,<br>2016 | Prevalence of clinically significant decisional conflict: an analysis of five studies on decision-making in primary care.                              | No students' involvement |                                        |  |  |  |
| 26 | Hirpara<br>et al,<br>2016        | Understanding the complexities of shared decision-making in cancer: a qualitative study of the perspectives of patients undergoing colorectal surgery. | No students' involvement |                                        |  |  |  |
| 27 | Washington<br>et al,<br>2016     | A multimethod analysis of shared decision-making in hospice interdisciplinary team meetings including family caregivers.                               | No students' involvement |                                        |  |  |  |
| 28 | Moja et al,<br>2015              | Point of care information services: a platform for self-directed continuing medical education for front line decision makers.                          |                          | No SDM                                 |  |  |  |
| 29 | Couet et al,<br>2014             | The impact of DECISION+2 on patient intention to engage in shared decision making: secondary analysis of a multicentre clustered randomized trial      |                          | No health care professions involvement |  |  |  |
| 30 | Pai et al,<br>2013               | Workshop on using natural language processing applications for enhancing clinical decision making: an executive                                        | No students' involvement |                                        |  |  |  |

|             |                        |                                                                                                                                                                                             |                          |                                        |  |  |                 |
|-------------|------------------------|---------------------------------------------------------------------------------------------------------------------------------------------------------------------------------------------|--------------------------|----------------------------------------|--|--|-----------------|
|             |                        | summary                                                                                                                                                                                     |                          |                                        |  |  |                 |
| 31          | Légaré et al, 2011     | A conceptual framework for interprofessional shared decision making in home care: protocol for a feasibility study                                                                          |                          |                                        |  |  | Duplicate       |
| 32          | Kavanaugh et al, 2010  | Supporting parents' decision making surrounding the anticipated birth of an extremely premature infant                                                                                      | No students' involvement |                                        |  |  |                 |
| OVID-EMBASE |                        |                                                                                                                                                                                             |                          |                                        |  |  |                 |
| 33          | Tollow et al, 2020     | ""they were aware of who i was as a person": Patients' and health professionals' experiences of using the PEGASUS intervention to facilitate decision-making around breast reconstruction.. |                          |                                        |  |  | No full article |
| 34          | Michalsen et al, 2019  | Interprofessional shared decision-making in the ICU: A systematic review and recommendations from an expert panel.                                                                          |                          |                                        |  |  | Duplicate       |
| 35          | Ahmad et al, 2020      | Shared Decision-Making Measures: A Systematic Review.                                                                                                                                       |                          | No educational intervention            |  |  |                 |
| 36          | Adekpedjou et al, 2020 | Variations in factors associated with healthcare providers' intention to engage in interprofessional shared decision making in home care: results of two cross-sectional surveys.           | No students' involvement |                                        |  |  |                 |
| 37          | Jensen et al, 2019     | Perceptions of Ethical Decision-Making Climate among Clinicians Working in European and U.S. ICUs: Differences between Nurses and Physicians.*                                              | No students' involvement |                                        |  |  |                 |
| 38          | Gualano et al, 2019    | Could shared decision making affect staying in hospital? A cross-sectional pilot study.                                                                                                     |                          |                                        |  |  | Duplicate       |
| 39          | Park et al, 2018       | Shared decision-making in the paediatric field: a literature review and concept analysis.                                                                                                   |                          |                                        |  |  | Duplicate       |
| 40          | Othman et al, 2018     | Islam, the Qur'an, and medical decision-making - The experience of middle eastern muslim families with                                                                                      |                          | No health care professions involvement |  |  |                 |

|      |                     |                                                                                                                                                                         |                          |                             |  |  |                 |
|------|---------------------|-------------------------------------------------------------------------------------------------------------------------------------------------------------------------|--------------------------|-----------------------------|--|--|-----------------|
|      |                     | children undergoing stem cell transplantation in the United States.                                                                                                     |                          |                             |  |  |                 |
| 41   | Laurent et al, 2017 | Emotional impact of end-of-life decisions on professional relationships in the ICU: An obstacle to collegiality?                                                        | No students' involvement |                             |  |  |                 |
| 42   | Peicius et al, 2017 | Are advance directives helpful for good end of life decision making: a cross sectional survey of health professionals.                                                  | No students' involvement |                             |  |  |                 |
| 43   | -----               | Finding a way to support children and young people in shared treatment decision-making in paediatric oncology: The spirit framework.                                    |                          |                             |  |  | No full article |
| 44   | -----               | Symposium on clinical decision making.                                                                                                                                  |                          |                             |  |  | No full article |
| 45   | Parsons et al, 2011 | Will shared decision making between patients with chronic musculoskeletal pain and physiotherapists, osteopaths and chiropractors improve patient care.?                | No students' involvement |                             |  |  |                 |
| 46   | Légaré et al, 2011  | A conceptual framework for interprofessional shared decision making in home care: protocol for a feasibility study.                                                     |                          |                             |  |  | Duplicate       |
| 47   | Légaré et al, 2010  | Validating a conceptual model for an inter-professional approach to shared decision making: A mixed methods study.                                                      | No students' involvement |                             |  |  |                 |
| 48   | ----                | Doctor-patient-family communication and decision-making: A systematic review of cancer consultations.                                                                   |                          |                             |  |  | No full article |
| 49   | Lee et al, 2008     | Professional relationships in palliative care decision making.                                                                                                          |                          |                             |  |  | Duplicate       |
| ERIC |                     |                                                                                                                                                                         |                          |                             |  |  |                 |
| 50   | Hodges et al, 2018  | Exploring Professional Decision Making in Relation to Safeguarding: A Grounded Theory Study of Social Workers and Community Nurses in Community Learning (Intellectual) |                          | No educational intervention |  |  |                 |

|                      |                                  |                                                                                                                                                            |                          |                                        |  |  |  |
|----------------------|----------------------------------|------------------------------------------------------------------------------------------------------------------------------------------------------------|--------------------------|----------------------------------------|--|--|--|
|                      |                                  | Disability Teams in Wales                                                                                                                                  |                          |                                        |  |  |  |
| 51                   | Baker-Ericzén et al, 2015        | Clinical Decision-Making in Community Children's Mental Health: Using Innovative Methods to Compare Clinicians with and without Training in Evidence-Based |                          | No educational intervention            |  |  |  |
| 52                   | Lambert, 2012                    | The Allied Health Care Professional's Role in Assisting Medical Decision Making at the End of Life                                                         | No students' involvement |                                        |  |  |  |
| 53                   | Lambert et al, 2005              | Factors Affecting Long-Term-Care Residents' Decision-Making Processes as They Formulate Advance Directives                                                 |                          | No educational intervention            |  |  |  |
| 54                   | Werner et al, 2004               | Nurses' and Social Workers' Attitudes and Beliefs about and Involvement in Life-Sustaining Treatment Decisions                                             | No students' involvement |                                        |  |  |  |
| 55                   | Carter & Maroney, 2003           | Collaborative Decision Making in the NICU: When Life Is Uncertain, Satisfice [sic]                                                                         | No students' involvement |                                        |  |  |  |
| <b>EBSCO- CINAHL</b> |                                  |                                                                                                                                                            |                          |                                        |  |  |  |
| 56                   | Sund-Levander & Tingström, 2013, | Clinical decision-making process for early nonspecific signs of infection in institutionalised elderly persons: experience of nursing assistants.          | No students' involvement |                                        |  |  |  |
| 57                   | Whitley, 2009                    | The implications of race and ethnicity for shared decision-making.                                                                                         | No students' involvement |                                        |  |  |  |
| 58                   | Coyne, 2008                      | Children's participation in consultations and decision-making at health service level: a review of the literature.                                         | No students' involvement |                                        |  |  |  |
| 59                   | Gallagher et al, 2014            | Negotiated reorienting: A grounded theory of nurses' end-of-life decision-making in the intensive care unit.                                               | No students' involvement |                                        |  |  |  |
| 60                   | Antunes et al, 2014              | An application framework for developing collaborative handheld decision-making tools.                                                                      |                          | No health care professions involvement |  |  |  |
| 61                   | Isaksso                          | Validity and reliability testing of the                                                                                                                    | No students'             |                                        |  |  |  |

|                        |                         |                                                                                                                                                                                         |                          |                                        |  |  |           |
|------------------------|-------------------------|-----------------------------------------------------------------------------------------------------------------------------------------------------------------------------------------|--------------------------|----------------------------------------|--|--|-----------|
|                        | n et al, 2014           | Swedish version of Melbourne Decision Making Questionnaire.                                                                                                                             | involvement              |                                        |  |  |           |
| 62                     | Inghelbrech et al, 2008 | Factors related to the involvement of nurses in medical end-of-life decisions in Belgium: a death certificate study.                                                                    | No students' involvement |                                        |  |  |           |
| 63                     | Werner et al, 2004      | Nurses' and social workers' attitudes and beliefs about and involvement in life-sustaining treatment decisions.                                                                         | No students' involvement |                                        |  |  |           |
| <b>Cochrane Trails</b> |                         |                                                                                                                                                                                         |                          |                                        |  |  |           |
| 64                     | ---                     | A Patient-centered Continuous and Interdisciplinary Shared Decision Making Approach for Breast Cancer Rehabilitation                                                                    | No students' involvement |                                        |  |  |           |
| 65                     | Adekpedjou et al, 2020  | Variations in factors associated with healthcare providers' intention to engage in interprofessional shared decision making in home care: results of two cross-sectional surveys        |                          |                                        |  |  | Duplicate |
| 66                     | 2018                    | Implementing Shared Decision Making in Interprofessional Home Care Teams                                                                                                                |                          | No health care professions involvement |  |  |           |
| 67                     | Légaré et al, 2015      | Improving Decision Making On Location of Care With the Frail Elderly and Their Caregivers                                                                                               | No students' involvement |                                        |  |  |           |
| 68                     | 2018                    | Intervention to Improve Shared Decision Making Among Seniors With Dementia, Their Caregivers and Healthcare Providers                                                                   | No students' involvement |                                        |  |  |           |
| 69                     | 2019                    | Impact of an Interprofessional Shared Decision-making and Goal-setting Decision Aid for Patients With Diabetes                                                                          | No students' involvement |                                        |  |  |           |
| 70                     | Yu et al, 2015          | Impact of an interprofessional shared decision-making and goal-setting decision aid for patients with diabetes on decisional conflict--study protocol for a randomized controlled trial | No students' involvement |                                        |  |  |           |
| 71                     | Al-Itejawi et al,       | Effectiveness of Implementing Shared Decision-Making on Quality of Care Among Patients with Lumbar                                                                                      |                          | No health care professions involvement |  |  |           |

|              |                           |                                                                                                                                                                                                        |                          |                                                  |  |  |                 |
|--------------|---------------------------|--------------------------------------------------------------------------------------------------------------------------------------------------------------------------------------------------------|--------------------------|--------------------------------------------------|--|--|-----------------|
|              | 2017                      | Degenerative Diseases                                                                                                                                                                                  |                          |                                                  |  |  |                 |
| 72           | ----                      | Ready for SDM - evaluation of a multidisciplinary training module in Shared Decision Making                                                                                                            |                          |                                                  |  |  | No full article |
| 73           | ----                      | Helping People to Choose Wisely: evaluating Question Based Interventions to Support Shared Decision Making in Healthcare                                                                               |                          |                                                  |  |  | No full article |
| 74           | ----                      | Implementation of Shared Decision-Making in Cancer Care                                                                                                                                                |                          |                                                  |  |  | No full article |
| 75           | Manne et al, 2016         | Attitudes and Decisional Conflict Regarding Breast Reconstruction Among Breast Cancer Patients                                                                                                         |                          | No health care professions involvement           |  |  |                 |
| 76           | Brown et al, 2014         | The impact of consultation skills training in shared decision making on doctor behavior, confidence and stress and burnout: a randomized controlled trial                                              |                          | No different health care professions involvement |  |  |                 |
| 77           | Lightbody et al, 2016     | Inter-rater reliability of clinical decision making based on recorded telemedicine assessments and case histories                                                                                      |                          |                                                  |  |  | No full article |
| 78           | Al-Itejawi et al, 2015    | Effectiveness, cost-utility and implementation of a decision aid for patients with localised prostate cancer and their partners: study protocol of a stepped-wedge cluster randomised controlled trial | No students' involvement |                                                  |  |  |                 |
| 79           | ---                       | The Effect of Teaching Decision Skills on the Students' Ethical Evolution                                                                                                                              |                          |                                                  |  |  | No full article |
| 80           | Lühnen et al, 2017        | Informed decision-making with and for people with dementia – evaluation of an education program for legal representatives                                                                              |                          | No different health care professions involvement |  |  |                 |
| APA PsycInfo |                           |                                                                                                                                                                                                        |                          |                                                  |  |  |                 |
| 81           | Baker-Ericzén et al, 2015 | Clinical decision-making in community children's mental health: Using innovative methods to compare clinicians with and without training in evidence-based treatment.                                  | No students' involvement |                                                  |  |  |                 |



|    |                              |                                                                                                                                                                                                                                             |                          |                                                  |  |  |  |
|----|------------------------------|---------------------------------------------------------------------------------------------------------------------------------------------------------------------------------------------------------------------------------------------|--------------------------|--------------------------------------------------|--|--|--|
| 82 | Friesen - Storms et al, 2015 | Shared decision making in chronic care in the context of evidence based practice in nursing.                                                                                                                                                |                          | No different health care professions involvement |  |  |  |
| 83 | Chong et al, 2013            | Shared decision-making and interprofessional collaboration in mental healthcare: A qualitative study exploring perceptions of barriers and facilitators.                                                                                    | No students' involvement |                                                  |  |  |  |
| 84 | Chong et al, 2013            | Multiple perspectives on shared decision-making and interprofessional collaboration in mental healthcare.                                                                                                                                   | No students' involvement |                                                  |  |  |  |
| 85 | Duner, 2013                  | Care planning and decision-making in teams in Swedish elderly care: A study of interprofessional collaboration and professional boundaries.                                                                                                 | No students' involvement |                                                  |  |  |  |
| 86 | Laidsaar-Powell et al, 2013  | Physician-patient-companion communication and decision-making: A systematic review of triadic medical consultations.                                                                                                                        | No students' involvement |                                                  |  |  |  |
| 87 | Berger et al, 2012           | The health professional-patient-relationship in conventional versus complementary and alternative medicine. A qualitative study comparing the perceived use of medical shared decision-making between two different approaches of medicine. | No students' involvement |                                                  |  |  |  |
| 88 | Dugas et al, 2012            | Decision aid tools to support women's decision making in pregnancy and birth: A systematic review and meta-analysis.                                                                                                                        | No students' involvement |                                                  |  |  |  |
| 89 | Schmitt et al, 2011          | Supporting patients' decision making: Interprofessional perspectives.                                                                                                                                                                       | No students' involvement |                                                  |  |  |  |
| 90 | Simmons et al, 2010          | Shared decision-making: Benefits, barriers and current opportunities for application.                                                                                                                                                       | No students' involvement |                                                  |  |  |  |
| 91 | Hoving et al, 2010           | A history of patient education by health professionals in Europe and North America: From authority to                                                                                                                                       | No students' involvement |                                                  |  |  |  |

|          |                       |                                                                                                                                                                 |                          |                                                  |  |  |                 |
|----------|-----------------------|-----------------------------------------------------------------------------------------------------------------------------------------------------------------|--------------------------|--------------------------------------------------|--|--|-----------------|
|          |                       | shared decision making education.                                                                                                                               |                          |                                                  |  |  |                 |
| 92       | Le'gare et al, 2008'  | Barriers and facilitators to implementing shared decision-making in clinical practice: Update of a systematic review of health professionals' perceptions.      | No students' involvement |                                                  |  |  |                 |
| 93       | Say et al, 2006       | Patients' preference for involvement in medical decision making: A narrative review.                                                                            | No students' involvement |                                                  |  |  |                 |
| 94       | Leeuwen et al, 2004   | Considerations of Healthcare Professionals in Medical Decision-Making About Treatment for Clinical End-Stage Cancer Patients.                                   | No students' involvement |                                                  |  |  |                 |
| 95       | Werner et al, 2004    | Nurses' and social workers' attitudes and beliefs about and involvement in life-sustaining treatment decisions.                                                 |                          |                                                  |  |  | Duplicated      |
| 96       | Bliss & While, 2003   | Decision-making in palliative and continuing care in the community: An analysis of the published literature with reference to the context of UK care provision. | No students' involvement |                                                  |  |  |                 |
| 97       | Le'gare et al., 2011' | Interprofessionalism and shared decision-making in primary care :a stepwise approach towards a new model                                                        |                          |                                                  |  |  | Duplicated      |
| 98       | Diouf et al., 2016    | Training health professionals in shared decision making: Update of an international environmental scan                                                          |                          |                                                  |  |  | Duplicated      |
| Opengrey |                       |                                                                                                                                                                 |                          |                                                  |  |  |                 |
| 99       | ---                   | Ethical decision making within multidisciplinary teams                                                                                                          |                          |                                                  |  |  | No full article |
| 100      | Young, 2012           | An Exploration of Clinical Decision-Making Amongst Students and Newly Qualified Midwives                                                                        |                          | No different health care professions involvement |  |  |                 |
| 101      | ---                   | The impact of attitudes towards death on treatment decision-making in student health professionals                                                              |                          |                                                  |  |  | No full article |

|               |                             |                                                                                                                                                                                                                                                                               |                             |  |  |  |                 |
|---------------|-----------------------------|-------------------------------------------------------------------------------------------------------------------------------------------------------------------------------------------------------------------------------------------------------------------------------|-----------------------------|--|--|--|-----------------|
| 102           | Jenkins<br>on,<br>2012      | Working with patients with<br>disfiguring conditions : medic's<br>beliefs, decision making processes<br>and training needs                                                                                                                                                    | No students'<br>involvement |  |  |  |                 |
| <b>Mednar</b> |                             |                                                                                                                                                                                                                                                                               |                             |  |  |  |                 |
| 103           | Rennke<br>et al,<br>2017    | The SDM 3 Circle Model: A<br>Literature Synthesis and Adaptation<br>for Shared Decision-Making in the<br>Hospital                                                                                                                                                             | No students'<br>involvement |  |  |  |                 |
| 104           | Frosch<br>et al,<br>2009    | Adjuncts or adversaries to shared<br>decision-making? Applying the<br>Integrative Model of behavior to the<br>role and design of decision support<br>interventions in healthcare<br>interactions                                                                              | No students'<br>involvement |  |  |  |                 |
| 105           | Yu et<br>al,<br>2015        | Impact of an interprofessional shared<br>decision-making and goal-setting<br>decision aid for patients with diabetes<br>on decisional conflict – study protocol<br>for a randomized controlled trial                                                                          |                             |  |  |  | Duplicate       |
| 106           | Dogba<br>et al,<br>2016     | The Evolution of an Interprofessional<br>Shared Decision-Making Research<br>Program: Reflective Case Study of an<br>Emerging Paradigm                                                                                                                                         | No students'<br>involvement |  |  |  |                 |
| 107           | Gschw<br>endtner<br>, 2016  | RCT Regarding SDM Online Training<br>and Face-to-face SDM Training                                                                                                                                                                                                            |                             |  |  |  | No full article |
| 108           | Huang<br>et al,<br>2015     | Shared decision making with<br>oncologists and palliative care<br>specialists effectively increases the<br>documentation of the preferences for<br>do not resuscitate and artificial<br>nutrition and hydration in patients<br>with advanced cancer: a model testing<br>study | No students'<br>involvement |  |  |  |                 |
| 109           | Hofste<br>de et al,<br>2011 | Designing an implementation strategy<br>to improve interprofessional shared<br>decision making in sciatica: study<br>protocol of the DISC study                                                                                                                               | No students'<br>involvement |  |  |  |                 |
| 110           | Légaré                      | Validating a conceptual model for an                                                                                                                                                                                                                                          |                             |  |  |  | Duplicate       |

|     |                 |                                                                                    |                             |  |  |  |  |
|-----|-----------------|------------------------------------------------------------------------------------|-----------------------------|--|--|--|--|
|     | et al,<br>2010  | inter-professional approach to shared<br>decision making: a mixed methods<br>study |                             |  |  |  |  |
| 111 | Boyles,<br>2010 | Shared Decision-Making Is Better<br>Than Solo                                      | No students'<br>involvement |  |  |  |  |

**Table S2.** Quality assessment of included articles.

| Ref No.      | Author (s), year of publication | Title                                                                                                                                    | Quality indicators                                             |                                                                                                      |                                                                                |                                                                                                                |                                                                                |                                                                            |                                       |                                       |                                          |                                           |                                                    | Total Score |
|--------------|---------------------------------|------------------------------------------------------------------------------------------------------------------------------------------|----------------------------------------------------------------|------------------------------------------------------------------------------------------------------|--------------------------------------------------------------------------------|----------------------------------------------------------------------------------------------------------------|--------------------------------------------------------------------------------|----------------------------------------------------------------------------|---------------------------------------|---------------------------------------|------------------------------------------|-------------------------------------------|----------------------------------------------------|-------------|
|              |                                 |                                                                                                                                          | 1                                                              | 2                                                                                                    | 3                                                                              | 4                                                                                                              | 5                                                                              | 6                                                                          | 7                                     | 8                                     | 9                                        | 10                                        | 11                                                 |             |
|              |                                 |                                                                                                                                          | Research question (s)                                          | Study Subjects                                                                                       | Data collection method                                                         | Completeness of data                                                                                           | Control for confounding                                                        | Analysis of results                                                        | Conclusions                           | Reproducibility                       | Prospective                              | Ethical Issues                            | Triangulation                                      |             |
|              |                                 |                                                                                                                                          | Is/are the research question (s) or hypothesis clearly stated? | Is the subject group appropriate (size, characteristics, selection) for the study being carried out? | Are the methods used reliable and valid for the research question and context? | Have subjects dropped out? Is the attrition rate less than 50%? Is the questionnaire response rate acceptable? | Have multiple factors/ variables been removed or accounted for where possible? | Are the statistical or other methods of results analysis used appropriate? | Can the data justify the conclusions? | Could another group repeat the study? | Does the study look forward or backward? | Were ethical issues addressed adequately? | Were results supported by data from other studies? |             |
| OVID-MEDLINE |                                 |                                                                                                                                          |                                                                |                                                                                                      |                                                                                |                                                                                                                |                                                                                |                                                                            |                                       |                                       |                                          |                                           |                                                    |             |
| 12           | Légaré et al., 2008             | Advancing theories, models and measurement for an interprofessional approach to shared decision-making in primary care: a study protocol | Yes                                                            | Yes                                                                                                  | Yes                                                                            | Yes                                                                                                            | Yes                                                                            | Not reported                                                               | Not reported                          | Yes                                   | Yes                                      | Yes                                       | Not reported                                       | 7           |
| 72           | Légaré et                       | Validating a conceptual model                                                                                                            | Not                                                            | Yes                                                                                                  | Yes                                                                            | Yes                                                                                                            | Yes                                                                            | Yes                                                                        | Yes                                   | Yes                                   | No                                       | Not                                       | Yes                                                | 8           |

|           |                          |                                                                                                                                                                     |              |     |     |     |              |     |     |     |     |              |              |           |
|-----------|--------------------------|---------------------------------------------------------------------------------------------------------------------------------------------------------------------|--------------|-----|-----|-----|--------------|-----|-----|-----|-----|--------------|--------------|-----------|
|           | al., 2010                | for an interprofessional approach to shared decision-making: a mixed methods study                                                                                  | reported     |     |     |     |              |     |     |     |     | reported     |              |           |
| <b>21</b> | Kryworuchko et al., 2013 | Interventions for Shared Decision-Making About Life Support in the Intensive Care Unit: A Systematic Review                                                         | Yes          | Yes | Yes | Yes | No           | Yes | Yes | Yes | No  | Yes          | Yes          | <b>9</b>  |
| <b>22</b> | Orchard et al., 2012     | Assessment of Interprofessional Team Collaboration Scale (AITCS): Development and Testing of the Instrument                                                         | Not reported | Yes | Yes | Yes | Yes          | Yes | Yes | Yes | Yes | Not reported | Yes          | <b>9</b>  |
| <b>23</b> | Thomson et al., 2017     | Making Decisions Better: an evaluation of an educational Intervention                                                                                               | Yes          | Yes | Yes | Yes | Not reported | Yes | Yes | Yes | Yes | Yes          | Yes          | <b>10</b> |
| <b>24</b> | Waldron et al., 2016     | Development of a video-based education and process change intervention to improve advance cardiopulmonary resuscitation decision-making                             | Not reported | Yes | Yes | Yes | Yes          | Yes | Yes | Yes | Yes | Yes          | Yes          | <b>10</b> |
| <b>25</b> | Sangaletti et al., 2017  | Experiences and shared meaning of teamwork and interprofessional collaboration among health care professionals in primary health care settings: a systematic review | Not reported | Yes | Yes | Yes | Not reported | Yes | Yes | Yes | No  | Not reported | Yes          | <b>7</b>  |
| <b>26</b> | Nguyen et al., 2019      | Conventional and Complementary Medicine Health Care Practitioners' Perspectives on Interprofessional Communication: A Qualitative Rapid Review                      | Not reported | Yes | Yes | Yes | Not reported | Yes | Yes | Yes | Yes | Not reported | Yes          | <b>8</b>  |
| <b>27</b> | Shiao et al., 2019       | Creation of nurse-specific integrated interprofessional collaboration and team efficiency scenario/video improves trainees' attitudes and performances              | Not reported | Yes | Yes | Yes | Yes          | Yes | Yes | Yes | Yes | Yes          | Yes          | <b>10</b> |
| <b>28</b> | Voogdt-Pruis et          | Improvement of shared decision-making in integrated stroke care:                                                                                                    | Yes          | Yes | Yes | Yes | Yes          | Yes | Yes | Yes | Yes | Not reported | Not reported | <b>9</b>  |

|        |                                |                                                                                                                                             |              |     |     |     |              |     |     |     |     |              |     |    |
|--------|--------------------------------|---------------------------------------------------------------------------------------------------------------------------------------------|--------------|-----|-----|-----|--------------|-----|-----|-----|-----|--------------|-----|----|
|        | al., 2019                      | a before and after evaluation using a questionnaire survey                                                                                  |              |     |     |     |              |     |     |     |     |              |     |    |
| PubMed |                                |                                                                                                                                             |              |     |     |     |              |     |     |     |     |              |     |    |
| 29     | Légaré et al., 2011            | Interprofessionalism and shared decision-making in primary care : a stepwise approach towards a new model                                   | Not reported | Yes | Yes | Yes | Not reported | Yes | Yes | Yes | No  | Not reported | Yes | 7  |
| 30     | McLaughlin et al., 2014        | Rational and Experiential Decision-Making Preferences of Third-Year Student Pharmacists                                                     | Not reported | Yes | Yes | Yes | Yes          | Yes | Yes | Yes | Yes | Not reported | Yes | 9  |
| 31     | Chung et al., 2016             | Educational interventions to train healthcare professionals in end-of-life communication: a systematic review and meta-analysis             | Not reported | Yes | Yes | Yes | Not reported | Yes | Yes | Yes | No  | Not reported | Yes | 7  |
| 32     | Diouf et al., 2016             | Training health professionals in shared decision-making: Update of an international environmental scan                                      | Not reported | Yes | Yes | Yes | Yes          | Yes | Yes | N/A | Yes | Yes          | Yes | 9  |
| 33     | Johnsen et al., 2016           | Teaching clinical reasoning and decision-making skills to nursing students: Design, development, and usability evaluation of a serious game | Not reported | Yes | Yes | Yes | Yes          | Yes | Yes | Yes | Yes | Yes          | Yes | 10 |
| 34     | Kryworuchko et al., 2016       | Factors influencing communication and decision-making about life-sustaining technology during serious illness: a qualitative study          | Not reported | Yes | Yes | Yes | Yes          | Yes | Yes | Yes | Yes | Yes          | Yes | 10 |
| 35     | Lestari et al., 2016           | Understanding students' readiness for interprofessional learning in an Asian context: a mixed-methods study                                 | Yes          | Yes | Yes | Yes | Yes          | Yes | Yes | Yes | Yes | Yes          | Yes | 11 |
| 36     | Lütgendorf-Caucig et al., 2017 | Vienna Summer School on Oncology: how to teach clinical decision-making in a multidisciplinary environment                                  | Not reported | Yes | Yes | Yes | Not reported | Yes | Yes | Yes | Yes | Yes          | Yes | 9  |
| 37     | Légaré et al., 2018            | Interventions for increasing the use of shared decision-making by healthcare professionals                                                  | Not reported | Yes | Yes | Yes | Not reported | Yes | Yes | Yes | No  | Not reported | Yes | 7  |

[illegible]



[illegible]

|              |                                 |                                                                                                                                                                                                      |              |     |     |     |              |     |     |     |     |     |              |     |    |
|--------------|---------------------------------|------------------------------------------------------------------------------------------------------------------------------------------------------------------------------------------------------|--------------|-----|-----|-----|--------------|-----|-----|-----|-----|-----|--------------|-----|----|
| 50           | Gigue` re et al., 2012          | Development of PRIDE: A tool to assess physicians' preference of role in clinical decision-making                                                                                                    | Not reported | Yes | Yes | Yes | Yes          | Yes | Yes | Yes | Yes | Yes | Not reported | Yes | 9  |
| 51           | Körner et al., 2012             | Interprofessional SDM train-the-trainer programme "Fit for SDM": provider satisfaction and impact on participation                                                                                   | Yes          | Yes | Yes | Yes | Yes          | Yes | Yes | Yes | Yes | No  | Yes          | Yes | 10 |
| 52           | Sheridan et al., 2012           | Shared decision-making for prostate cancer screening: the results of a combined analysis of 2 practice-based randomized controlled trials                                                            | Not reported | Yes | Yes | Yes | Yes          | Yes | Yes | Yes | Yes | No  | Not reported | Yes | 8  |
| 53           | Yu et al., 2015                 | Impact of an interprofessional shared decision-making and goal-setting decision aid for patients with diabetes on decisional conflict – study protocol for a randomized controlled trial             | Not reported | Yes | Yes | Yes | Yes          | Yes | Yes | Yes | Yes | Yes | Yes          | Yes | 10 |
| 54           | Giguère et al., 2018            | Tailoring and evaluating an intervention to improve shared decision-making among seniors with dementia, their caregivers, and healthcare providers: study protocol for a randomized controlled trial | Not reported | Yes | Yes | Yes | Yes          | Yes | Yes | Yes | Yes | Yes | Yes          | Yes | 10 |
| 55           | Hendricks-Ferguson et al., 2018 | Undergraduate students' perspectives of healthcare professionals' use of shared decision-making skills                                                                                               | Not reported | Yes | Yes | Yes | Yes          | Yes | Yes | Yes | Yes | Yes | Yes          | Yes | 10 |
| 56           | Arenth et al., 2019             | Teaching the Skill of Shared Decision-Making Utilizing a Novel Online Curriculum: a Blinded Randomized Controlled Pilot Study (S803)                                                                 | Not reported | Yes | Yes | Yes | Not reported | Yes | Yes | Yes | Yes | Yes | Not reported | Yes | 8  |
| APA PsycInfo |                                 |                                                                                                                                                                                                      |              |     |     |     |              |     |     |     |     |     |              |     |    |
| 75           | Keefe et al., 2002              | Medical Students, Clinical Preventive Services, and Shared Decision-Making                                                                                                                           | Not reported | Yes | Yes | Yes | Yes          | Yes | Yes | Yes | Yes | Yes | Not reported | Yes | 9  |
| 79           | Stacey et al., 2010             | Shared decision-making models to inform an interprofessional perspective on decision-making:                                                                                                         | Not reported | Yes | Yes | Yes | Not reported | Yes | Yes | No  | Yes | Yes | Yes          | Yes | 8  |

|             |                             |                                                                                                                                                    |              |              |     |     |              |              |              |     |     |              |     |    |
|-------------|-----------------------------|----------------------------------------------------------------------------------------------------------------------------------------------------|--------------|--------------|-----|-----|--------------|--------------|--------------|-----|-----|--------------|-----|----|
|             |                             | A theory analysis                                                                                                                                  |              |              |     |     |              |              |              |     |     |              |     |    |
| 18          | Col et al., 2011            | Interprofessional education about shared decision-making for patients in primary care settings                                                     | Not reported | Yes          | Yes | Yes | Yes          | Yes          | Yes          | No  | Yes | Yes          | Yes | 9  |
| 57          | Hagoel et al., 2011         | Interprofessional education about decision support for patients across cultures                                                                    | Not reported | Yes          | Yes | Yes | Yes          | Yes          | Yes          | Yes | Yes | Yes          | Yes | 10 |
| 58          | Lown et al., 2011           | Continuing professional development for interprofessional teams supporting patients in healthcare decision-making                                  | Yes          | Yes          | Yes | Yes | Not reported | Yes          | Yes          | Yes | Yes | Yes          | Yes | 10 |
| 59          | Neville et al., 2013        | Team decision-making: design, implementation and evaluation of an interprofessional education activity for undergraduate health science students   | Not reported | Yes          | Yes | Yes | Yes          | Yes          | Yes          | Yes | Yes | Yes          | Yes | 10 |
| 60          | Thistlethwaite et al., 2016 | Introducing the individual Teamwork Observation and Feedback Tool (iTOFT): Development and description of a new interprofessional teamwork measure | Not reported | Yes          | Yes | Yes | Yes          | Yes          | Yes          | Yes | Yes | Not reported | Yes | 9  |
| ERIC        |                             |                                                                                                                                                    |              |              |     |     |              |              |              |     |     |              |     |    |
| 61          | Elwyn et al., 2017          | A three-talk model for shared decision-making: multistage consultation process                                                                     | Not reported | Yes          | Yes | Yes | Not reported | Yes          | Yes          | No  | No  | Yes          | Yes | 7  |
| 62          | Grey et al., 2017           | Advance Care Planning and Shared Decision-Making: An Interprofessional Role-Playing Workshop for Medical and Nursing Students                      | Not reported | Yes          | Yes | Yes | Yes          | Yes          | Yes          | Yes | Yes | Yes          | Yes | 10 |
| Hand search |                             |                                                                                                                                                    |              |              |     |     |              |              |              |     |     |              |     |    |
| 80          | Curran, 2004                | Interprofessional Education for Collaborative Patient-Centred Practice Research Synthesis Paper                                                    | Yes          | Not reported | Yes | Yes | Not reported | Not reported | Yes          | Yes | No  | Yes          | Yes | 7  |
| 73          | Hales & Hawryluk, 2008      | An interactive educational workshop to improve end-of-life communication skills                                                                    | Not reported | Yes          | Yes | Yes | Yes          | Yes          | Yes          | Yes | Yes | Yes          | Yes | 10 |
| 63          | Green & Levi, 2011          | Teaching advance care planning to medical students with a computer-based decision aid                                                              | Yes          | Yes          | Yes | Yes | Yes          | Yes          | Not reported | Yes | Yes | Not reported | Yes | 9  |

|           |                          |                                                                                                                                                       |              |              |     |     |              |              |     |     |     |              |     |           |
|-----------|--------------------------|-------------------------------------------------------------------------------------------------------------------------------------------------------|--------------|--------------|-----|-----|--------------|--------------|-----|-----|-----|--------------|-----|-----------|
| <b>64</b> | Thompson & Stapley, 2011 | Do educational interventions improve nurses' clinical decision-making and judgement? A systematic review                                              | Not reported | Yes          | Yes | Yes | Not reported | Yes          | Yes | Yes | No  | Not reported | Yes | <b>7</b>  |
| <b>65</b> | Légaré et al., 2012      | Training health professionals in shared decision-making: an international environmental scan                                                          | Not reported | Not reported | Yes | Yes | Yes          | Yes          | Yes | Yes | Yes | Yes          | Yes | <b>9</b>  |
| <b>66</b> | Légaré et al., 2012      | Training family physicians in shared decision-making to reduce the overuse of antibiotics in acute respiratory infections: a cluster randomized trial | Not reported | Yes          | Yes | Yes | Yes          | Yes          | Yes | Yes | Yes | Not reported | Yes | <b>9</b>  |
| <b>67</b> | Körner et al., 2013      | Designing an interprofessional training programme for shared decision-making                                                                          | Not reported | Yes          | Yes | Yes | Not reported | Yes          | Yes | Yes | Yes | Yes          | Yes | <b>9</b>  |
| <b>68</b> | Schell et al., 2013      | Communication skills training for dialysis decision-making and end-of-life care in nephrology                                                         | Not reported | Yes          | Yes | Yes | Yes          | Yes          | Yes | Yes | Yes | Not reported | Yes | <b>9</b>  |
| <b>69</b> | Liaw et al., 2014        | An interprofessional communication training using simulation to enhance safe care for a deteriorating patient                                         | Not reported | Yes          | Yes | Yes | Yes          | Not reported | Yes | Yes | Yes | Yes          | Yes | <b>9</b>  |
| <b>70</b> | Jo, 2015                 | Effects of an educational programme on shared decision-making among Korean nurses                                                                     | Not reported | Yes          | Yes | Yes | Yes          | Yes          | Yes | Yes | Yes | Yes          | Yes | <b>10</b> |
| <b>71</b> | Simmons et al., 2016     | Shared decision-making in common chronic conditions: impact of a resident training workshop                                                           | Not reported | Yes          | Yes | Yes | Yes          | Yes          | Yes | Yes | Yes | Not reported | Yes | <b>9</b>  |
